# Supplementary material for: Predicting HLA-I peptide immunogenicity with deep learning and molecular dynamics
Source: Research Square preprint supplement (doi:10.21203/rs.3.rs-104972/v1), 2020-11-16
Supplement: Supplementary file 1 [file 5ad73c9b2116a7c8d7552159.docx]

**Supplementary Information**

**Predicting HLA-I peptide immunogenicity with deep learning and molecular dynamics**

Jeffrey K. Weber1, Diego Chowell2**,**3#, Chirag Krishna4#, Timothy A. Chan2,3,5,6*, Ruhong Zhou1,7*

1IBM Thomas J. Watson Research Center, Yorktown Heights, NY 10598, USA.

2Human Oncology and Pathogenesis Program, Memorial Sloan Kettering Cancer Center, New York, NY 10065, USA.

3Immunogenomics and Precision Oncology Platform, Memorial Sloan Kettering Cancer Center, New York, NY 10065, USA.

4Computational and Systems Biology Program, Memorial Sloan Kettering Cancer Center, New York, NY 10065, USA.

5Department of Radiation Oncology, Memorial Sloan Kettering Cancer Center, New York, NY 10065, USA.

6Weill Cornell School of Medicine, New York, NY 10065, USA.

7Department of Chemistry, Columbia University, New York, NY 10027, USA.

# These authors contributed equally to this work.

*Corresponding authors: [chant@mskcc.org](mailto:chant@mskcc.org) (TAC) or [ruhongz@us.ibm.com](mailto:ruhongz@us.ibm.com) (RZ)

**Supplementary Text**

As mentioned in the main text, recently published work by Riley et al.26 features an attempt to utilize predicted structures of peptide/HLA-I complexes for immunogenicity classification. The authors report relatively poor immunogenicity prediction results based on sequence-only classification, a fact that is later used to justify more expensive structural featurization techniques. While no sequence-only results are reported for their five-fold cross validation procedure, an AUC value of 0.61 is reported for a network trained on the entire dataset, suggesting that the cross validation result would be several points lower (mirroring the results from their structure based models, which decline from 0.73 to 0.69).

To provide a direct comparison between our sequence-based classifier and the one presented in Riley et al.26, we performed an identical five-fold cross validation procedure on the same 3,955 peptide set used in the published work26. The results are presented in Supplementary Table 1. Our sequence convolutional method achieves a mean AUC of 0.67 across the five test sets (after training on three and validating on the remaining set(s) of identical size). Though no directly comparable AUC was reported for the Riley-sequence only model, our sequence-only model very likely outperforms their model to a significant degree, as models trained on an “entire dataset” (reported to have an AUC of 0.61) are likely to perform better than those subjected to five-fold cross validation. More strikingly, our result nearly reaches the level of the Riley structural model26, which requires performing a protein structure prediction step on each peptide prior to classification. Accordingly, a refined convolutional architecture allows these previously reported structural features to be replaced with less complex sequence features at only at a slight deficit to immunogenicity prediction performance. Our refined architecture that integrates molecular dynamics simulations is demonstrated to improve classification outcomes even more dramatically in the context of pathogen vs. self peptides.

**Supplementary Figure 1. Breakdown of data sources for models trained on MD data.**

**Supplementary Table 1**

**Immunogenicity prediction comparison on previously published 3955 peptide set.**

| **Method** | **AUC** |
| --- | --- |
| Sequence Only (5-fold, Riley et al.) | ---- |
| Sequence Only (Entire Dataset, Riley et al.) | 0.61 |
| Sequence Only (5-fold, Current model) | 0.67 |
| Structural Model (5-fold, Riley et al.) | 0.69 |

**Supplementary Table 2**

**Sequence-only results for neoantigen classification**

|  | **Small Neo** | | **Full Neo** |
| --- | --- | --- | --- |
|  | (n = 33) | (n=291) | |
| Sequence only (trained on Riley et al. set; n=3955) | 0.55 | 0.50 | |
| Sequence only (trained on full set; n=2883) | 0.50 | 0.46 | |

**Supplementary Table 3**

**Immunogenicity prediction on neoantigen data.**

|  | **Small Neo** | **Full Neo** |
| --- | --- | --- |
|  | (n = 33) | (n=291) |
| Sequence only (trained on NS/S MD set; n=218) | 0.67 | 0.57 |
| MD only (trained on NS/S MD set; n=218) | 0.59 | 0.49 |
| MD plus sequence (trained on NS/S MD set; n=218) | **0.71** | **0.61** |
